# Supplementary material for: Modulation of ethylene responses by OsRTH1 overexpression reveals the biological significance of ethylene in rice seedling growth and development
Source: PubMed Central journal article supplement — J Exp Bot. 2012 Mar 26;63(11):4151–64. doi: 10.1093/jxb/ers098 (PMC3398448; doi:10.1093/jxb/ers098), 2012-03-26
Supplement: supp_ers098_00075309-file001.pdf [file supp_ers098_00075309-file001.pdf]

## Modulation of Ethylene Responses by *OsRTH1* Overexpression Reveals Biological Significance of Ethylene in Rice Seedling Growth and Development

Wei Zhang<sup>1,ϕ</sup>, Xin Zhou<sup>1,2,ϕ</sup>, and Chi-Kuang Wen<sup>1,\*</sup>

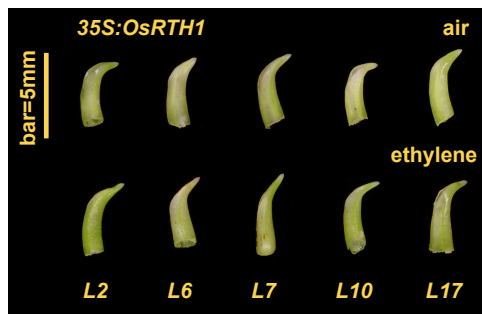

**Supplemental Figure S1.** Coleoptile phenotype of light-grown *35S:OsRTH1* transformation rice lines grown in air and ethylene. Transformation lines are *L* with a number. Ethylene: 100  $\mu\text{L L}^{-1}$ .
